# Saccade vigor as an implicit measure of subjective economic value

Tehrim Yoon<sup>1</sup>, Afareen Jaleel<sup>1</sup>, Alaa A. Ahmed<sup>2</sup>, and Reza Shadmehr<sup>1</sup>

1. Laboratory for Computational Motor Control, Dept. of Biomedical Engineering,

Johns Hopkins School of Medicine, Baltimore, MD

2. Depts. of Integrative Physiology and Mechanical Engineering, University of Colorado, Boulder, CO

**Abstract.** Decisions are made based on the subjective value that the brain assigns to options. However, subjective value is a mathematical construct that cannot be measured directly, but only inferred from choices. Is there another aspect of behavior that directly reflects subjective valuation of an option? Recent results have demonstrated that movement vigor is modulated by reward, raising the possibility that there is a link between how the brain evaluates an option, and how it controls movements toward that option. Alternatively, vigor may reflect salience and not value of the stimulus, growing larger for both stimuli that promise gain as well as stimuli that foretell loss. To dissociate between these possibilities, we asked people to choose among risky options represented by abstract stimuli, some associated with gain, others with loss. From their choices we estimated the subjective value that they assigned to each stimulus. In probe trials, they viewed only one stimulus at a time, and we measured their saccade vigor. We found that vigor was lowest for stimuli that promised loss, highest for stimuli that promised gain. This implied that vigor corresponded to value not salience. Naturally, a given stimulus was valued more by some participants. Remarkably, those who valued a given stimulus more tended to move with greater vigor in response to that stimulus. Thus, subjective value of a stimulus monotonically modulated the vigor with which the eyes moved to acquire a stimulus, suggesting that subjective valuation may be inferred from movement vigor.

**Significance statement.** Does vigor of movements in response to an option reflect the subjective value that the brain has assigned to that option? If this were the case, vigor may provide an objective assay of subjective value, obviating the need to infer this variable from measurements of choice. Here, we show that saccade vigor varies monotonically with subjective value: smallest for stimuli that predict economic loss, and highest for stimuli that predict economic gain. Notably, between-subject differences in valuation may be gleaned from the between-subject differences in their patterns of vigor.

**Correspondence:** Reza Shadmehr, Johns Hopkins School of Medicine, 410 Traylor Building, 720 Rutland Ave., Baltimore, MD 21205. Email: shadmehr@jhu.edu

*“A true theory of economy can only be attained by going back to the great springs of human action --- the feelings of pleasure and pain.”* William Jevons (1866)

## Introduction

Theory of subjective value was introduced in the 19<sup>th</sup> century to account for the fact that in voluntary transactions, each party values the goods, labor, or money that they receive more than the goods, labor, or money that they provide (Jevons, 1866; Menger, 1871). The theory posited that subjective value is not specified

by an objective property of the good, but rather the incremental increase in pleasure that an individual assigns to acquisition of that good (Jevons, 1866). Although subjective valuation is an important aspect of behavioral economics, it is an abstract quantity that cannot be measured directly. Rather, it must be inferred from decisions that individuals make (von Neumann and Morgenstern, 1944), often in scenarios involving lotteries and risky options.

A serendipitous discovery in motor neuroscience is the observation that factors that affect preference, such as reward and effort, also affect movements (Shadmehr et al., 2019). For example, when stimuli of varying reward value are presented at random, people and other primates move with a

shorter reaction time and greater velocity towards stimuli that promise greater gain (Kawagoe et al., 1998; Milstein and Dorris, 2007; Xu-Wilson et al., 2009; Yoon et al., 2018; Summerside et al., 2018). Recent work (Sedaghat-Nejad et al., 2019) has shown that if presentation of a stimulus results in a reward prediction error, the movement that ensues tends to be expressed with greater vigor (defined as the reciprocal of reaction-time plus movement-duration). Intriguingly, reward prediction error is the principal variable that modulates dopamine release (Schultz et al., 1997; Bayer and Glimcher, 2005), and stimulation of dopamine around movement onset tends to increase vigor (da Silva et al., 2018). Thus, both the process of learning subjective value from reward prediction error, and control of vigor, depend on dopamine, raising the intriguing possibility that the vigor with which an individual moves toward an option is influenced by the subjective value that the brain assigns to that option. If this were the case, vigor may provide an objective assay of subjective value, obviating the need to infer this variable from measurements of choice.

Alternatively, vigor may not reflect subjective value, but rather the salience of the stimulus. For example, both the stimulus that promises a large gain and the stimulus that foretells a large loss are important and may garner more attention than stimuli that promise smaller gain and loss. If vigor is a reflection of salience, then vigor will not increase monotonically with subjective value, but rather produce a U-shaped function, becoming larger for both gains and losses.

There are plausible neural mechanisms that support this alternate hypothesis. Saccade vigor is partly modulated by the excitatory inputs that the superior colliculus receives from the cortical regions which compute subjective value: the frontal eye field (FEF) (Hanes and Schall, 1996; Heitz and Schall, 2012; Glaser et al., 2016) and the lateral intraparietal (LIP) area (Platt and Glimcher, 1999; Louie and Glimcher, 2010). LIP neurons that encode stimulus value exhibit greater activity both when the stimulus promises a large reward, and when the stimulus promises a large penalty (Leathers and Olson, 2012). Some of these neurons exhibit sensitivity to both novelty and value (Foley et al., 2014). Furthermore, some dopamine neurons increase their activity when the stimulus promises reward, whereas others increase their activity for both punishment and reward (Matsumoto and Hikosaka, 2009). Thus, the neural activity that could modulate saccade vigor shows sensitivity to value as well as salience. This leads us to the question of whether vigor

monotonically reflects valuation over a range that includes both losses and gains, or is vigor a U-shaped function of value.

Here we examined this question by measuring saccades in a task where humans learned to associate value to abstract stimuli that were paired with losses or gains. In decision trials that involved risky options, they deliberated between various stimuli and made a choice, from which we inferred the subjective value that they assigned to the stimuli. In probe trials that involved only a single stimulus they made a saccade, from which we measured their vigor. We found that vigor in probe trials was lowest for stimuli that promised a loss, and highest for stimuli that promised a gain. Notably, between-subject differences in valuation could be gleaned from the between-subject differences in their patterns of vigor.

## Materials and Method

Healthy participants ( $n=24$ ,  $26.3 \pm 8.2$  years old, mean  $\pm$  SD, 8 females) with no known neurological disorders and normal color vision sat in a well-lit room in front of an LED monitor (59.7 x 33.6 cm, 2560 x 1440 pixels, light gray background, frame rate 144 Hz) placed at a distance of 35 cm. Their head was restrained using a bite bar. They viewed visual stimuli on the screen, and we measured their eye movements using an EyeLink 1000 (SR Research) infrared recording system (sampling rate 1 KHz). Only the right eye was tracked. All subjects were naïve to the paradigm. The experiments were approved by the Johns Hopkins University School of Medicine Institutional Review Board, and all subjects signed the written consent form approved by the board. Participants were paid \$15/hour regardless of any behavioral outcome. One participant was excluded from the results presented here because their performance in the task was at chance level, suggesting that they did not learn to assign value to the various stimuli.

*Stimulus properties.* Our goal was to assess whether saccade vigor of an individual was associated with the value that they had learned to assign to an abstract stimulus. We performed an experiment in which through experience, people learned the value of 10 abstract visual stimuli. Each stimulus was a  $2^\circ \times 2^\circ$  colored square, designated with a "+" or "-" (Fig. 1B). Each square was randomly assigned to a point distribution, with a mean that ranged from loss of 5 points to gain of 5 points. The points associated with each color were selected randomly on each trial from a beta distribution with parameters  $\alpha = \beta = 2$ , scaled so

that each color was associated with a single mean: -5, -4, ..., +5. The plus and minus indicator at the center of the square noted the sign of the mean of the distribution. The color to point association was selected randomly for each subject, but remained consistent throughout the experiment. For example, the plus yellow square in Fig. 1B was associated with a distribution with mean equal to gain of 4 points, and the minus yellow square was associated with mean equal to loss of 4 points. In addition to these 10 colored squares, a black square with "0" at the center was associated with exactly 0 points.

*Decision trials and probe trials.* The experiment contained two types of trials, randomly intermixed. Both types of trials (Fig. 1A) began with a center fixation period that lasted for 1 sec and ended with a beep (1 KHz). In decision trials, the fixation point was replaced with three different colored stimuli. One stimulus appeared alone and represented a sure bet (100% probability of acquiring the points associated with that stimulus). The other two stimuli appeared together and represented a risky bet (each with 50% probability). The participant had 5 seconds to indicate their choice by making a saccade in direction of their choice to targets (square,  $0.5 \times 0.5^\circ$ ) that appeared on the horizontal axis at  $\pm 20^\circ$ . Once the saccade concluded, the stimuli at center were erased and the trial consequences were displayed for 1 sec: the earned stimulus was displayed at the dot location along with text that indicated the number of points acquired. The points were drawn from the random distribution associated with the colored stimulus. Failure to make a choice within the time limit resulted in loss of 10 points. The trial ended with the display of the color stimulus and the amount of points gained or lost for that trial (duration of 1 sec).

In probe trials, the fixation point was removed, a single stimulus (chosen at random from the 10 colored stimuli) was displayed at center, and a dot appeared on the horizontal axis (at  $\pm 20^\circ$ ). This was the instruction for the subject to make a saccade to the dot. Once the saccade concluded, the stimulus at center was erased and displayed at the dot location, along with text that indicated the number of points that the subject had gained or lost for the trial. As in the decision trials, the points were drawn from the random distribution associated with the colored stimulus.

*Experiment design.* Before the start of the experiment, the subjects were instructed that there were 10 stimuli consisting of two sets of 5 colored boxes that

represented points that could be gained or lost on each trial. "Each color will indicate how many points you will gain or lose. Black box will always give zero points when chosen. Boxes with plus signs will add to your score, while boxes with minus signs will decrease your score. For example, if orange box with plus sign indicates gain of 10, orange box with minus sign will indicate loss of 10."

The experiment consisted of 11 blocks, each with 100 trials. The first block was a training block and began with 100 points and included only probe trials. The remaining 10 blocks each had 40 probe trials and 60 decision trials, distributed randomly. The total score was reset to 100 at the start of the 2<sup>nd</sup> block. For probe trials, each of the 10 colored squares was presented with equal frequency within each block, distributed randomly. In probe trials, the direction of the dot was chosen randomly at left or right but with equal frequency within each block.

In a decision trial, we randomly picked 3 stimuli from among the 11 stimuli. We presented the medium valued stimulus as the sure bet and the other two stimuli (one loss, and the other gain) as the risky bet. Subjects were not provided any information about the value of the stimuli and thus had to make their decisions solely based on consequences of previous trials. The side that represented the sure bet was random and chosen with equal left-right frequency for each block. Following completion of the second block, the final score of the previous block was carried over as the starting score of the next block. At the conclusion of every 4<sup>th</sup> trial, the total score earned was displayed at center fixation.

*Data analysis.* Eye position data were filtered with a second-order Savitzky-Golay filter (frame size 11, degree 3). Saccade onset and offset were determined in real time with  $20^\circ/\text{s}$  threshold. We identified valid saccades as those that occurred between stimuli with start and endpoints that were within  $5^\circ$  of the boundaries of the start and end images (to account for the fact that subjects were not specifically instructed to fixate on a precise location). For probe trials, we excluded reaction times that were larger than 1 sec.

Our objective was to test whether behavior in probe trials reflected the subjective value that we had estimated from decision trials. Thus, we analyzed vigor of saccades only in probe trials, and inferred subjective value based on choices made in decision trials. Statistical testing relied on linear mixed-effect models. In each model, the dependent variables were saccade

peak velocity and reaction time, fixed effects were stimulus objective value and subjective value, and random effects were individuals. Dependent variables were normalized for each individual by dividing the measured value by the within subject mean. Statistics were performed on normalized dependent variables.

*Estimating subjective value of stimuli.* The objective value of each stimulus was set by the mean of the point distribution associated with each colored square (Fig. 1B). The participants formed subjective values based on the choices that they made and the points that they earned. We estimated the subjective value of a stimulus for each subject based on their choices in the decision trials.

In a decision trial, the choice was between a sure option (a single stimulus) and a risky option (two stimuli, 50% chance of each). To model the choices that subjects made, we designed a one-layer perceptron network that had as its input the three stimuli that were available on each trial. The output of the network was the probability of picking the sure option (Fig. 1C). The input  $\mathbf{x}$  was an 11 element vector, with each element representing one of the stimuli  $x_1, \dots, x_{11}$  starting from the most negative to the most positive, and the black square (0 points) being the sixth element. On each trial, the input vector  $\mathbf{x}$  was set so that one element had value of -1 for the sure stimulus, two elements had value of 0.5 for the pair of risky stimuli, and 0 for the remaining elements. The weight vector  $\mathbf{u}$  represented the subjective value of each stimulus, and was also an 11 element vector. A linear combination of the available stimuli were represented with variable  $z$ :

$$z = \mathbf{u}^T \mathbf{x} \quad (1)$$

For example, if in a given trial the sure option was stimulus  $x_4$ , and the risky option was stimuli  $x_2$  and  $x_7$ , then  $z = 0.5(x_2 + x_7) - x_4$ . In other words, the variable  $z$  represented the difference between the subjective values of the two options. This was then transformed via a logistic function that produced an output  $y$  that represented the probability of picking the sure option:

$$y = \frac{1}{1 + \exp(-z)} \quad (2)$$

From the decisions that each participant made we estimated the subjective value that they had assigned to each stimulus, represented via the weight vector  $\mathbf{u}$ . We assumed that the subjective value of the zero stimulus (the sixth element of  $\mathbf{u}$ ) was exactly zero. To

find the remaining weights, we used a binary cross-entropy loss function:

$$loss = -\frac{1}{N} \sum (t \log y + (1-t) \log(1-y)) \quad (3)$$

In the above equation,  $N$  is the total number of decision trials (600). Binary variable  $t$  represented the actual decision of the subject, with 1 for choosing the risky option, and 0 for the sure option. To find  $\mathbf{u}$ , we differentiated Eq. (3) with respect to  $\mathbf{u}$ , thus providing a stochastic gradient descent estimate of the subjective values. We stopped the algorithm when the norm of change of the subjective value  $\Delta \mathbf{u}$  for was less than  $10^{-4}$ .

*Using vigor in probe trials to predict choice in decision trials.* Once we determined the reaction time and peak saccade velocity associated with a given stimulus in the probe trials, we asked whether vigor could serve as a proxy for subjective value. To evaluate the accuracy of such a policy we used two different approaches: a winner take all approach that predicted choice in the decision trials, and a likelihood estimate approach that predicted probability of choice in decision trials.

In the winner take all approach, for each stimulus in the probe trials we computed saccade velocity and reaction time, imagined that subjective value of the stimulus was set by these variables, and then on each decision trial used these measures to predict choice. For example, to evaluate the vigor policy, we assigned subjective value to the 11 stimuli based on vigor on the probe trials, and then used this to predict choice of the participant in each of the decision trials: pick the option that has the larger vigor estimated subject value (100% of the vigor for the sure option stimulus, vs. sum of 50% of vigor for each of the risky option stimuli). We compared the accuracy of this vigor-based and reaction time-based policy with a policy that made choices based on subjective values that were estimated based on the actual decisions of each subject. To predict outcomes, we used the actual options faced by each participant. We used Wilcoxon signed-rank test to compare performance of the various policies.

In the likelihood estimate approach, we began by setting the vector  $\mathbf{u}$  to be equal to the mean reaction time (or peak velocity) for the various stimuli in the probe trials. We then used this vigor based estimate of subjective value to predict the probability that the participant would pick the sure option in a given decision trial:



$$y = \frac{1}{1 + \exp(-\beta z)} \quad (4)$$

In the above formulation, the term  $\beta$  appears because unlike Eq. (2),  $z$  in Eq. (4) has units that are different than subjective value. We used Eq. (3) to guide the gradient descent procedure for finding  $\beta$  for each participant. Thus, using vigor as an estimate for subjective value, we used Eq. (4) to predict the probability that on a given trial the participant would pick the sure option. We then evaluated the goodness of this policy by computing the negative log likelihood (NLL). We compared the vigor based policy to a random policy. NLL for the random policy was one in which the probability of choosing the sure option was 0.5 (equivalent to having elements of  $\mathbf{u}$  equal to each other).

## Results

On a decision trial, participants were presented with a sure option and a risky option. Some of the choices made by a representative participant are shown in Fig. 1D. The x-axis of this plot presents the objective value of the sure option on each trial (mean of the point distribution associated with that stimulus, Fig. 1B). The y-axis of Fig. 1D presents the probability that the participant selected the sure option. The various colored dots indicate the stimuli that were presented for the risky option. For example, the green dots show the probability that the participant picked the sure option when the risky option consisted of a (+)yellow and a (-)orange stimulus. The expected value of risky option was 0.5: (+)yellow = 4 and (-)orange = -5. Indeed, this participant tended to pick the sure option if that option had a value greater than 0.5. In another example, the red dots show the probability that the participant picked the sure option when the risky option consisted of a (-)teal and a (+)orange stimulus. In this case, the risky option had an expected value of 1.5. The participant now picked the sure option when that option had a value that was greater than 1.5.

The colors and their point value were chosen randomly for each subject. We used a logistic function to model the choices that each participant made in the decision trials (Eq. 2). This produced an estimate of the probability that on a trial with arbitrary sure and risky stimuli, the subject would choose the sure option (lines in Fig. 1D). From this fit to the decision trials we extracted the participant's subjective value for each stimulus via elements of the vector  $\mathbf{u}$ .

Examples of subjective values inferred from choices made by two participants are illustrated in Fig. 1E (left panel). Participant S03 learned a shallow function, distinguishing between positive and negative valued stimuli, but not distinguishing well within stimuli that were positive or negative. In contrast, participant S05 learned a steep function that distinguished well between and within negative and positive stimuli. Thus, among the participants there was diversity in the value that they assigned each stimulus, as shown by the distribution of subjective vs. objective value slope ( $0.88 \pm 0.40$ , mean  $\pm$  SD, Fig. 1E, right panel). As we will see, this diversity played an important role in the question of whether vigor was driven by subjective value.

The average patterns of subjective value are displayed across the participants in Fig. 1F. We found that on average, subjective value strongly correlated with objective value of the stimuli ( $r^2 = 0.72$ ;  $p < 10^{-30}$ ). Notably, within participant analysis of subjective value revealed a main effect of objective value ( $F(1,262) = 585.7$ ,  $p < 10^{-30}$ ), demonstrating that as the objective value of the stimuli increased, so did the subjective value that the participants had assigned to them. These results suggested that through experience, the participants learned to assign value to the abstract stimuli, resulting in subjective values that varied roughly monotonically with the objective values of the stimuli. However, there were also differences among participants, with some learning steep value functions while others learning shallow functions.

### *Vigor and subjective valuation of a stimulus*

Our main question was whether vigor in probe trials reflected the subjective value that the participants had learned. In probe trials a single stimulus appeared at center indicating the value of that trial. Presentation of the stimulus served as the go cue and the dependent variables on each trial were reaction time and saccade velocity. Participants had 5 seconds to make a saccade to the peripheral dot and by doing so earned the loss or gain that was associated with the stimulus. Notably, the loss that was earned by the negative valued stimuli was always less than the large penalty (10 points) that would be accrued if the subjects did not make the correct saccade.

The top subplot of Fig. 2A illustrates saccade velocities for a representative participant in probe trials for a stimulus that promised a +5 gain, and a stimulus that promised a -5 loss. The reaction times for these two stimuli are presented in the bottom subplot of Fig.

2A. In response to a high valued stimulus, the saccades of this participant exhibited a shorter reaction time and a higher peak velocity.

To test these trends across the participants, we normalized saccade peak speed and reaction times for each individual with respect to their own mean as measured across probe trials. The results are plotted in the top part of Fig. 2B. Within subject analysis revealed that saccade velocity increased with objective value of the stimulus ( $F(1,228)=28.6$ ,  $p=2.2 \times 10^{-7}$ ). Similarly, reaction time decreased with the objective value of the stimulus ( $F(1,228)=50.6$ ,  $p=1.4 \times 10^{-11}$ ). Thus, vigor was not a U-shaped function of stimulus value, but rather a function that tended to be smallest for stimuli that were associated with loss, and largest for stimuli that were associated with gain.

However, the participants differed in how they valued each stimulus (Fig. 1E). Within participants, did the subjective value that they assign to each stimulus affect their saccade vigor? The bottom part of Fig. 2B illustrates the peak velocity and reaction time data plotted as a function of subjective value assigned by the participants. (To make this plot, we began with the distribution of subjective values across all subjects, and then sampled that distribution into 10 bins of equal probability. Thus, the bins have error bars in both x- and y- dimensions.) We found that as subjective value increased, saccade velocity tended to increase (within subject effect of subjective value,  $F(1,228)=33.6$ ,  $p=2.3 \times 10^{-8}$ ), and reaction time tended to decrease (within subject effect of subjective value,  $F(1,228)=62.2$ ,  $p=1.3 \times 10^{-13}$ ). Notably, the data suggested that reaction time was more sensitive to perceived loss, whereas velocity was more sensitive to perceived gain (linear mixed effects model, interaction between subjective value and RT vs. subjective value and velocity, loss region:  $F(1,226)=13.2$ ,  $p=3.5 \times 10^{-4}$ ; gain region:  $F(1,226)=4.4$ ,  $p=0.036$ ).

Participants differed in how they assigned values to the various stimuli: some naturally assigned a larger value to a given stimulus than others (Fig. 1E). An interesting question was whether this between-subject difference in valuation could be gleaned from their vigor patterns. To examine this question, we described our hypothesis via a graphical model (Fig. 3A). In this model, choice depended on subjective value, which in turn depended (through learning) on the objective value of the stimulus. In our null hypothesis ( $H_0$ , Fig. 3A), the objective value affected vigor, whereas subjective value affected choice. In our main hypothesis ( $H_1$ , Fig. 3A), objective value affected subjective value, which in

turn affected both choice and vigor. Under  $H_1$ , if a subject had learned to associate a small subjective value with a stimulus, then their vigor would be low in response to that stimulus. However, if that same stimulus was valued highly by another subject, then their vigor would be high. Thus, to test this hypothesis, we kept objective value constant and asked whether changes in subjective value across participants modulated saccade vigor.

To explain how we evaluated this hypothesis, Fig. 3B illustrates peak velocity in probe trials as a function of subjective value for two different stimuli. For the stimulus with +5 objective value, some participants assigned a large value, while others assigned a small value. Similarly, for the stimulus that indicated a loss (-5 objective value), there was diversity in assignment of subjective values. However, individuals that assigned larger subjective value to a given stimulus also appeared to move with greater velocity in response to that stimulus.

To test for the consistency of this relationship, for each stimulus (constant objective value) we measured the vigor of a participant (i.e., the y-value of a point in Fig. 3B with respect to the mean of the points with the same color), and the subjective value that they had assigned (i.e., the x-value of a point in Fig. 3B with respect to the mean of the points with the same color). Thus, given a constant objective value, we measured how the between-subject differences in subjective value affected differences in vigor (Fig. 3C). We found that given a constant objective value, an increase in subjective value produced a reduction in reaction time ( $F(1,228)=8.7$ ,  $p=0.0036$ ), and an increase in peak velocity ( $F(1,228)=8.1$ ,  $p=0.0047$ ).

Another measure of between participant differences in subjective valuation is the slope of the relationship between subjective and objective values (Fig. 1E): for some, a change in objective value produced only a modest change in subjective valuation, resulting in a shallow slope. We found that the slope of subjective to objective values was correlated with the slope of saccade velocity with respect to subjective values (slope of velocity vs. subjective value compared to slope of subjective value vs. objective value,  $r^2=0.49$ ,  $p=0.019$ ).

Together, the results suggested that subjective value not only affected choice, but also vigor. Notably, people who learned to associate a greater value to a given stimulus also exhibited a greater vigor in response to that stimulus.

### *Vigor as a predictor of choice*

We next asked how well vigor measurements in probe trials could serve as a proxy for subjective value, thus predicting choices that individuals made in decision trials. The vigor measurements produced two policies: a policy that predicted decisions based on reaction time in probe trials, and another policy that predicted decisions based on peak velocity in the same trials. For example, on a given decision trial for a given participant, the reaction time policy assigned a subjective value to the available stimuli, and the policy then predicted the option that would be chosen. This served as the winner take all approach. In addition, we considered a likelihood approach in which we predicted the probability that the participant would pick the sure option based on their vigor patterns in the probe trials.

For the winner take all approach, we divided the decision trials into easy and hard based on the difference in the objective value of the sure and risky options: easy trials were denoted by objective value difference of 1 point or more, and hard trials were denoted by objective value difference of less than 1 point. We quantified accuracy of the vigor policies based on the number of correct predictions that the reaction time and the velocity policies made. To define an upper bound on prediction accuracy, we also quantified performance of a policy that relied on the logistic model that had fit the actual choices (termed logistic fit).

The results of the policy comparisons are shown in Fig. 3D. We found that for hard choices, a saccade velocity based policy performed no better than chance (Fig. 3D, left subplot, Wilcoxon signed rank test,  $p=0.99$ ). However, for the same hard choices a reaction time policy performed significantly better than chance (Wilcoxon signed rank test,  $p=0.0042$ ). Using the logistic fit as the upper bound for performance, on hard choices the reaction time policy performed at 75.2% relative accuracy (Fig. 3D, right subplot, relative activity is the number of correct decision trials made by the reaction time policy normalized by the number of correct decision trials by the logistic model).

For the easier choices, both the velocity based policy and the reaction time policy performed significantly better than chance (Fig. 3D, left subplot, velocity Wilcoxon signed rank test  $p=0.0225$ ; reaction time Wilcoxon signed rank test  $p=5.5 \times 10^{-4}$ ). On these easier choices, the velocity and reaction time policies performed at 67% and 73% relative accuracy.

Overall, using the winner take all approach, the vigor based policies that relied only on probe trials

predicted with roughly 70% relative accuracy the choices that individuals made in the decision trials.

In addition to predicting choice via winner take all, we also used vigor based estimates of subjective value to compute the probability of choosing the sure option (Eq. 4). We estimated the goodness of the vigor based predictions via negative log likelihood (NLL), and compared it to the NLL from a random policy. The NLL value of the velocity and reaction time policies were better than choosing randomly (two-sided t-test, velocity:  $p=0.0026$ ; reaction time:  $p=0.028$ ).

### *Vigor patterns in decision trials*

In the decision trials the participants expressed their choices with a saccade. We asked whether vigor patterns in the decision trials carried information about the contents of the trial.

The top plot of Fig. 4A displays time to decision (deliberation time) as well as saccade velocity as a function of trial difficulty. To quantify trial difficulty, we measured the subjective value of the chosen option minus the subjective value of the alternative option. For example, if the participant chose the sure option, trial difficulty was the subjective value of the chosen stimulus minus 0.5 times the sum of subjective values of the two stimuli in the risky option. As this difference became more positive, the decision became easier, and easier decisions coincided with a decrease in deliberation time (labeled DT in the top panel of Fig. 4,  $F(1,149)=68.3$ ,  $p=7.2 \times 10^{-14}$ ). However, trial difficulty did not modulate velocity of the saccade that signaled choice ( $F(1,160)=0.07$ ,  $p=0.79$ ). Thus, deliberation time was affected by task difficulty, but not velocity of the saccade that reported that decision.

The random nature of the stimuli resulted in some trials that predicted a large loss regardless of choice, and other trials that predicted a large gain. For example, when the sure stimulus was associated with a gain, the risky option often also included stimuli that summed to a gain. Thus in this case both options were associated with gain, producing a large trial value. When we considered trial value as the sum of the subjective values of both options, a pattern emerged: when the trial predicted a loss (because both options were bad), reaction times tended to be long and saccade velocities tended to be low (lower plot of Fig. 4). As trial value increased, so did saccade vigor (velocity:  $F(1.275)=20.3$ ,  $p=9.8 \times 10^{-6}$ ; RT:  $F(1,275)=133$ ,  $p=2.1 \times 10^{-25}$ ). The dependence of saccade vigor on trial value was present even after we normalized trials based on their difficulty (effect of sum of subjective values on RT in

easy trials:  $F(1,457)=130.5$ ,  $p=9.3 \times 10^{-27}$ ; in hard trials:  $F(1,457)=7.56$ ;  $p=0.0062$ ).

In summary, when the two options were both bad, forecasting a loss, vigor of the saccade that reported the choice was low (large RT, low velocity). As the value of the trial improved, forecasting a gain, saccade vigor increased.

## Discussion

Our brain makes decisions based on subjective valuation of the available options. Yet, how we value an option is a hidden variable that cannot be measured directly. Rather, it must be inferred from our decisions. Is there a component of behavior other than choice that can serve as a proxy for subjective valuation?

Here, we presented abstract visual stimuli that participants learned to associate with gains or losses. We inferred the values that each participant assigned to the stimuli from their choices in decision trials. In probe trials, we presented the participants a single stimulus and measured the vigor of their response via saccade reaction time and peak velocity. We found that vigor varied monotonically with the objective value of the stimulus: lowest for stimuli that forecasted loss, highest for stimuli that predicted gain. Notably, reaction time was more sensitive to perceived loss, whereas velocity was more sensitive to perceived gain.

As expected, some subjects valued a given stimulus more, whereas others valued it less. A critical question was whether between-subject differences in valuation could be gleaned from the between-subject differences in their patterns of vigor. We found that for a given stimulus (thus a constant objective value) there was a relationship between subjective value and vigor: individuals that assigned larger subjective value to a stimulus also tended to move with greater vigor in response to that stimulus. Overall, the vigor with which a subject moved in response to a stimulus predicted with 70% relative accuracy the choices that the subject would make in the decision trials (relative to how well we could predict those choices from the actual decision patterns).

### *Estimating subjective value*

Estimation of subjective value usually relies on a concept called certainty equivalence (CE): if the option is a risky one that has 50% probability of producing one of two results, then the CE will be the mean of the subjective values of the two results. This mathematical property makes estimating subjective value possible by measuring CE for various options. CE could be directly

reported by the subjects (Grether and Plott, 1979), or via fitting of a logistic function between the a fixed risky option and the variable sure option, or even using a psychological adaptive method such as PEST (parameter estimation by sequential testing) in which each option depends on the choice made in the previous option (Bostic et al., 1990;Christopoulos et al., 2009;Stauffer et al., 2014).

Here we employed a novel approach: we implemented a neural network, which we found to be an efficient way to learn subjective values from the patterns of choice. Our specific learning rule relied on a loss function that guaranteed that the result would produce the optimum prediction of choices made by each participant. Our approach had the advantage that it allowed us to use a relatively small number of decision trials (600) in which all stimuli were chosen at random. The method produced reasonable results: subjective valuation correlated strongly with objective value (Fig. 1F), producing correct prediction of choice on roughly 81% of the trials.

However, we analyzed the data based on an assumption of stationarity of subject values. That is, we assumed that subjective value was constant throughout the decision trials. We provided 100 baseline trials which likely provided some information about value of each stimulus to the participants before the decision trials began, but our assumption is clearly a simplification. Unfortunately, it is difficult to analyze the data without the assumption of stationarity because in that case one must assume a learning model, which introduces further unknown parameters that require fitting to behavior. However, if such an approach could be pursued, then one could estimate subjective value as a function of time, and look for correlations with vigor.

### *Subjective value monotonically varies with saccade vigor*

The main question that we wished to ask was whether vigor of a movement was a monotonic function of its subjective value across the range that spanned loss to gain. While subjective value may be lower for a loss, the stimulus that predicts a loss may have equal or greater salience than the stimulus that predicts gain. The neural circuits that influence saccade vigor are affected by both subjective valuation (Platt and Glimcher, 1999) and salience (Leathers and Olson, 2012), making it unclear whether vigor would be influenced by one or the other.

Reaction time and velocity of a saccade are variables that are controlled by activity of neurons in the superior colliculus (Dorris and Munoz, 1995;Dorris



et al., 1997; Sparks and Hu, 1999; Ratcliff et al., 2003; Smalianchuk et al., 2018). Collicular activity is in turn influenced by the excitatory inputs it receives from the cerebral cortex, and the inhibitory inputs that it receives from the basal ganglia. The cortical inputs include projections from the frontal eye field (FEF) and lateral intraparietal area (LIP), both of which house neurons that tend to respond more strongly to stimuli that predict greater reward (Glaser et al., 2016; Platt and Glimcher, 1999; Louie and Glimcher, 2010). The basal ganglia projections are from the substantia nigra reticulata (SNr), which houses inhibitory neurons that change their discharge in response to magnitude of reward (Sato and Hikosaka, 2002; Yasuda et al., 2012; Yasuda and Hikosaka, 2017). Thus, subjective valuation of a rewarding stimulus could, in principle, be reflected in an increase in the excitatory inputs to the colliculus from the cortex, and a decrease in the inhibitory inputs from the SNr, resulting in a saccade that has a shorter reaction time and greater velocity.

However, the cortical and basal ganglia inputs to the colliculus are also affected by stimulus salience, making it difficult to predict whether vigor might be a reflection of subjective value, or salience. For example, the earliest collicular (Kim and Basso, 2010) and LIP (Foley et al., 2014) responses are not a reflection of stimulus value, but rather its salience. Near saccade onset, when the collicular activity is most likely to affect velocity, some neurons produce a larger burst in response to more reward, whereas others show a smaller burst (Ikeda and Hikosaka, 2003). Furthermore, firing rates of neurons in the regions that project to the colliculus are not monotonically driven by value of the stimulus. For example, LIP neurons that respond with greater activity to more rewarding stimuli also respond more strongly to stimuli that predict a stronger air puff (Leathers and Olson, 2012). In the basal ganglia, activity of SNr neurons is controlled directly and indirectly by neurons in the striatum, which in turn are modulated by dopamine. Dopamine regulates how the striatal neurons respond to cortical inputs. However, while increased dopamine release before onset of a movement tends to invigorate that movement (Kawagoe et al., 2004), some dopaminergic neurons show increased activity in response to a reward predicting stimulus, while others respond with greater activity to both reward and punishment predicting stimuli (Matsumoto and Hikosaka, 2009).

Thus, assuming that saccade vigor is a reflection of excitatory cortical and inhibitory basal ganglia inputs to the colliculus, the current neurophysiological data do

not specify whether vigor should be a monotonic function of stimulus value, growing from loss to gain, or whether vigor should be a U-shaped function, showing increased activity both for large gains and large losses.

Here our results unequivocally demonstrate that saccade vigor grows monotonically with subjective economic value across the range that spans from loss to gain, and is not a U-shaped function. It is possible that in some of the earlier studies in which cortical and dopaminergic activity increased with punishment (for example air puff), the movement that followed may have been expressed with greater vigor (for example, increased rate of blinking).

Furthermore, we found that it was possible to infer some of the between-subject differences in valuation from the between-subject differences in patterns of vigor. An earlier study noted that a monkey that did not show vigor sensitivity to reward also lacked dopaminergic sensitivity to stimuli that predicted reward (Kawagoe et al., 2004). Thus, it is possibility that vigor may not only provide a new way with which to measure subjective valuation, but it may also provide a real-time behavioral proxy for dopaminergic activity (Sedaghat-Nejad et al., 2019).

### *Limitations*

In our experiment the participants learned the value of the stimuli through observation (probe trials) and choice (decision trials), but we analyzed the data as if the subject values were constant throughout the decision trials. A better approach would be to have a real-time estimate of subjective values during the task, but such an approach would require fitting behavior to a learning model, which introduces new parameters in the estimation problem. That approach remains to be developed.

In probe trials, the stimulus predicted a loss or gain if the participant performed the correct action (saccade to target). However, if the participant performed an incorrect action (or no action), the consequence was a large loss. Thus, in probe trials the participant could prevent a large loss by performing the correct action, but could not prevent the smaller loss associated the stimulus. In a different design in which the stimulus predicts a loss, but the correct action can prevent it, vigor of that action will likely grow with magnitude of loss. That is, if the correct action can aid in prevention of a loss, then vigor is unlikely to show the pattern we found here. This conjecture remains to be tested.

To test whether subjective value affects vigor, we relied on the fact that among participants, a given stimulus was associated with a range of subjective values. This between-subject analysis revealed that individuals who valued a stimulus more tended to also exhibit greater vigor. However, in order to conclusively infer a causal relationship between subject value and vigor we would need to test whether within participant changes in subjective value produce changes in vigor. One way with which subjective valuation may be increased is via expenditure of effort: individuals who expend effort in order to acquire a particular reward tend to increase the value that they assign that reward. With saccades, effort expenditure can be modulated via eccentricity (Yoon et al., 2018). Future work is needed to explore the within-subject changes in valuation with their vigor.

**Acknowledgements:** The work was supported by grants from the NIH (5-R01-NS078311, 1-R01-NS096083), the Office of Naval Research (N00014-15-1-2312), and the National Science Foundation (CNS-1714623).

#### Reference List

Bayer HM, Glimcher PW (2005) Midbrain dopamine neurons encode a quantitative reward prediction error signal. *Neuron* 47:129-141.

Bostic R, Herrnstein RJ, Luce RD (1990) The effect on the preference-reversal phenomenon of using choice indifference. *J Econ Behav Org* 13:193-212.

Christopoulos GI, Tobler PN, Bossaerts P, Dolan RJ, Schultz W (2009) Neural correlates of value, risk, and risk aversion contributing to decision making under risk. *J Neurosci* 29:12574-12583.

da Silva JA, Tecuapetla F, Paixao V, Costa RM (2018) Dopamine neuron activity before action initiation gates and invigorates future movements. *Nature* 554:244-248.

Dorris MC, Munoz DP (1995) A neural correlate for the gap effect on saccadic reaction times in monkey. *J Neurophysiol* 73:2558-2562.

Dorris MC, Pare M, Munoz DP (1997) Neuronal activity in monkey superior colliculus related to the initiation of saccadic eye movements. *J Neurosci* 17:8566-8579.

Foley NC, Jangraw DC, Peck C, Gottlieb J (2014) Novelty enhances visual salience independently of reward in the parietal lobe. *J Neurosci* 34:7947-7957.

Glaser JJ, Wood DK, Lawlor PN, Ramkumar P, Kording KP, Segraves MA (2016) Role of expected reward in frontal eye field during natural scene search. *J Neurophysiol* 116:645-657.

Grether DM, Plott CR (1979) Economic theory of choice and the preference reversal phenomenon. *Amer Econ Rev* 69:623-638.

Hanes DP, Schall JD (1996) Neural control of voluntary movement initiation. *Science* 274:427-430.

Heitz RP, Schall JD (2012) Neural mechanisms of speed-accuracy tradeoff. *Neuron* 76:616-628.

Ikeda T, Hikosaka O (2003) Reward-dependent gain and bias of visual responses in primate superior colliculus. *Neuron* 39:693-700.

Jevons WS (1866) Brief account of a General Mathematical Theory of Political Economy. *Journal of Royal Statistical Society* XXIX:282-287.

Kawagoe R, Takikawa Y, Hikosaka O (1998) Expectation of reward modulates cognitive signals in the basal ganglia. *Nature Neurosci* 1:411-416.

Kawagoe R, Takikawa Y, Hikosaka O (2004) Reward-predicting activity of dopamine and caudate neurons--a possible mechanism of motivational control of saccadic eye movement. *J Neurophysiol* 91:1013-1024.

Kim B, Basso MA (2010) A probabilistic strategy for understanding action selection. *J Neurosci* 30:2340-2355.

Leathers ML, Olson CR (2012) In monkeys making value-based decisions, LIP neurons encode cue salience and not action value. *Science* 338:132-135.

Louie K, Glimcher PW (2010) Separating value from choice: delay discounting activity in the lateral intraparietal area. *J Neurosci* 30:5498-5507.

Matsumoto M, Hikosaka O (2009) Two types of dopamine neuron distinctly convey positive and negative motivational signals. *Nature* 459:837-841.

Menger C (1871) *Principles of Economics*. Braumuller, Austria.

Milstein DM, Dorris MC (2007) The influence of expected value on saccadic preparation. *J Neurosci* 27:4810-4818.

Platt ML, Glimcher PW (1999) Neural correlates of decision variables in parietal cortex. *Nature* 400:233-238.

Ratcliff R, Cherian A, Segraves M (2003) A comparison of macaque behavior and superior colliculus neuronal activity to

predictions from models of two-choice decisions. *J Neurophysiol* 90:1392-1407.

Sato M, Hikosaka O (2002) Role of primate substantia nigra pars reticulata in reward-oriented saccadic eye movement. *J Neurosci* 22:2363-2373.

Schultz W, Dayan P, Montague PR (1997) A neural substrate of prediction and reward. *Science* 275:1593-1599.

Sedaghat-Nejad E, Herzfeld DJ, Shadmehr R (2019) Reward prediction error modulates saccade vigor. *J Neurosci* 39:5010-5017.

Shadmehr R, Reppert TR, Summerside EM, Yoon T, Ahmed AA (2019) Movement Vigor as a Reflection of Subjective Economic Utility. *Trends Neurosci* in press.

Smalianchuk I, Jagadisan UK, Gandhi NJ (2018) Instantaneous Midbrain Control of Saccade Velocity. *J Neurosci* 38:10156-10167.

Sparks DL, Hu X (1999) Saccade initiation and the reliability of motor signals involved in the generation of saccadic eye movements. In: *Novartis Foundation Symposium* pp 75. Chichester, N.Y.: John Wiley.

Stauffer WR, Lak A, Schultz W (2014) Dopamine reward prediction error responses reflect marginal utility. *Curr Biol* 24:2491-2500.

Summerside EM, Shadmehr R, Ahmed AA (2018) Vigor of reaching movements: reward discounts the cost of effort. *J Neurophys* 119:2347-2357.

von Neumann JV, Morgenstern O (1944) *Theory of games and economic behavior*. Princeton, N.J.: Princeton University Press.

Xu-Wilson M, Zee DS, Shadmehr R (2009) The intrinsic value of visual information affects saccade velocities. *Exp Brain Res* 196:475-481.

Yasuda M, Hikosaka O (2017) To Wait or Not to Wait- Separate Mechanisms in the Oculomotor Circuit of Basal Ganglia. *Front Neuroanat* 11:35.

Yasuda M, Yamamoto S, Hikosaka O (2012) Robust representation of stable object values in the oculomotor Basal Ganglia. *J Neurosci* 32:16917-16932.

Yoon T, Geary RB, Ahmed AA, Shadmehr R (2018) Control of movement vigor and decision making during foraging. *Proc Natl Acad Sci U S A* 115:E10476-E10485.

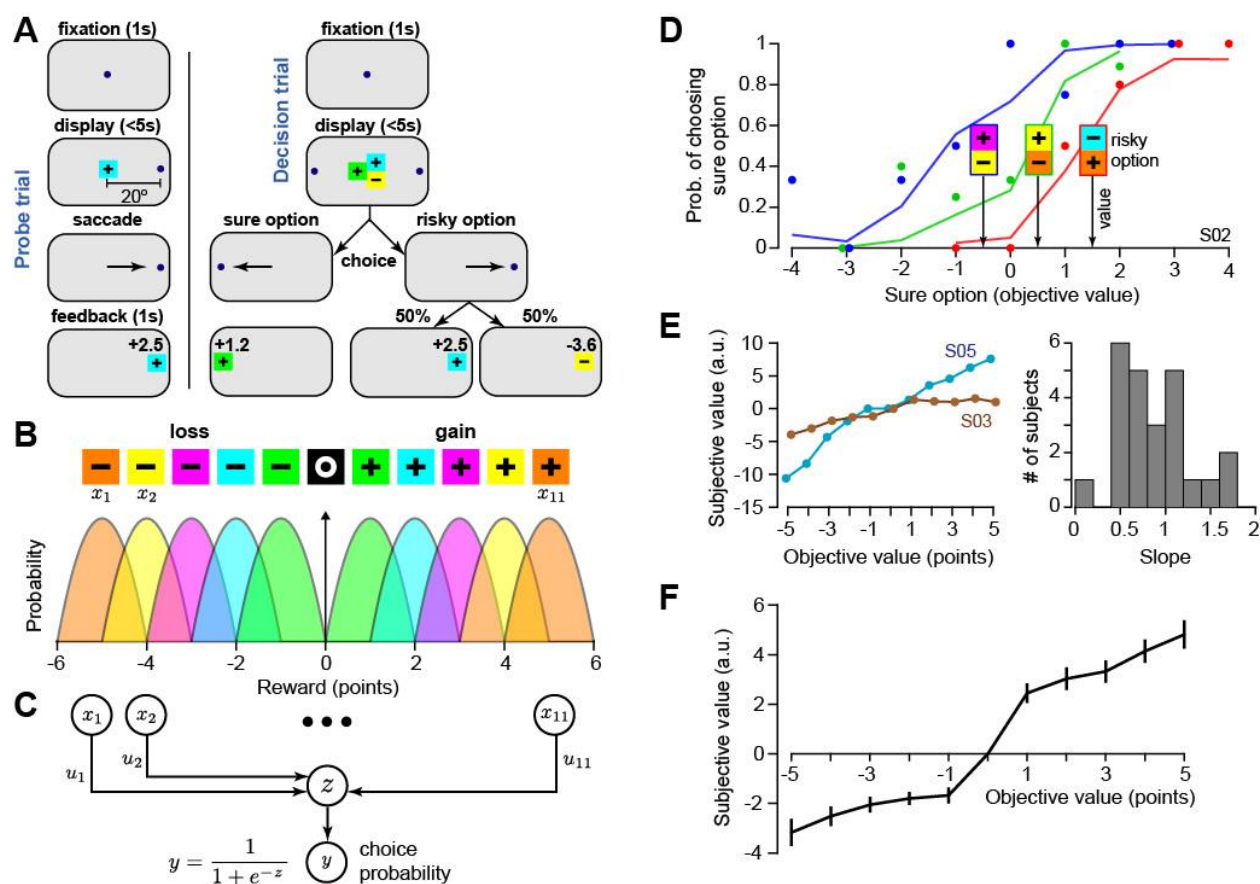

**Fig. 1.** Task design and learning to assign subjective value to abstract stimuli. **A.** In probe trials, a single stimulus was presented at center, the subject made a saccade to a dot located at  $\pm 20^\circ$ , and earned the points associated with that stimulus (gain or loss). In decision trials, a single stimulus representing a sure bet, and two stimuli representing a risk bet, appeared at center. The subject made a choice by making a saccade to one side or the other. **B.** The stimuli consisted of 11 boxes. The colored stimuli were associated with certain gain or loss (indicated with the plus or minus), each with a mean of a distribution as shown. The black stimulus was always associated with zero points. **C.** We used a perceptron to model the decision-making process. The input  $\mathbf{x}$  was an 11 element vector, with each element representing one of the stimuli  $x_1, \dots, x_{11}$  starting from the most negative to the most positive, and the black square (0 points) being the sixth element. On each trial, the input vector  $\mathbf{x}$  was set so that one element had value of -1 for the sure stimulus, two elements had value of 0.5 for the pair of risky stimuli, and 0 for the remaining elements. The weight vector  $\mathbf{u}$  represented the subjective value of each stimulus. Variable  $z$  was determined by Eq. (1), and the output of the network was the probability of picking the sure option. **D.** Some of the choices made by a participant. The colored dots indicate the stimuli that were presented for the risky option, the x-axis is the point value of the sure option, and the y-axis is the probability of picking the sure option. For example, the green dots show the probability that the participant picked the sure option when the risky option consisted of a (+)yellow and a (-)orange stimulus. The expected value of risky option was 0.5: (+)yellow = 4 and (-)orange = -5. This participant tended to pick the sure option if that option had a value greater than 0.5. **E.** There was diversity in the subjective valuation that the participants learned to assign to the stimuli. The left panel shows subjective values that two participants learned. The right panel shows the distribution of the slope of the subjective vs. objective values across the participants. **F.** Subjective values across all participants. Error bars are SEM.



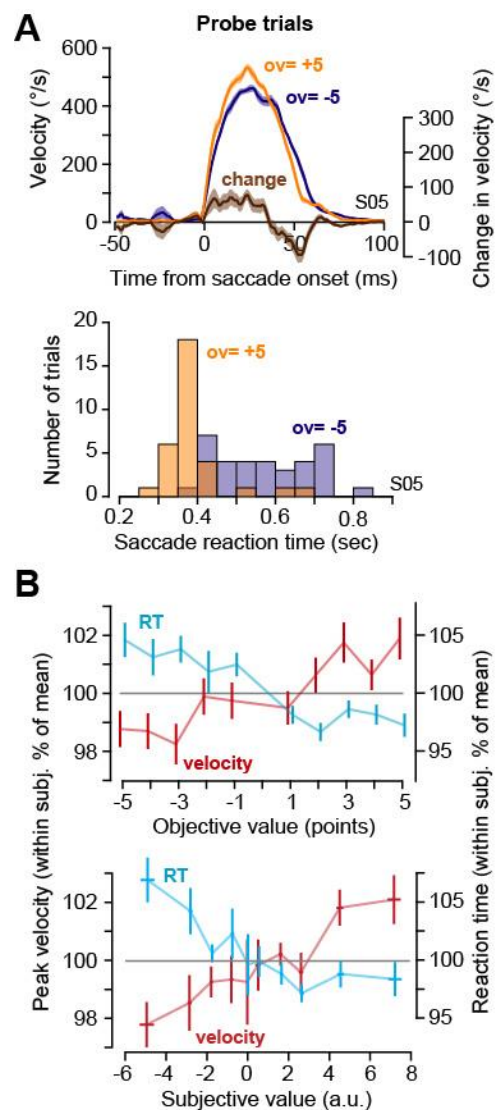

**Fig. 2.** Saccade vigor characteristics in probe trials. **A.** Data from a single participant. Top subplot shows saccade velocity in probe trials in which the stimuli had objective values of +5 and -5. Bottom subplot shows saccade reaction times for the same two stimuli. Error bars are within subject SEM. **B.** Peak saccade velocity and reaction times as a function of objective and subject values. Saccade data are normalized within subject with respect to their own mean. Error bars are between-subject SEM.

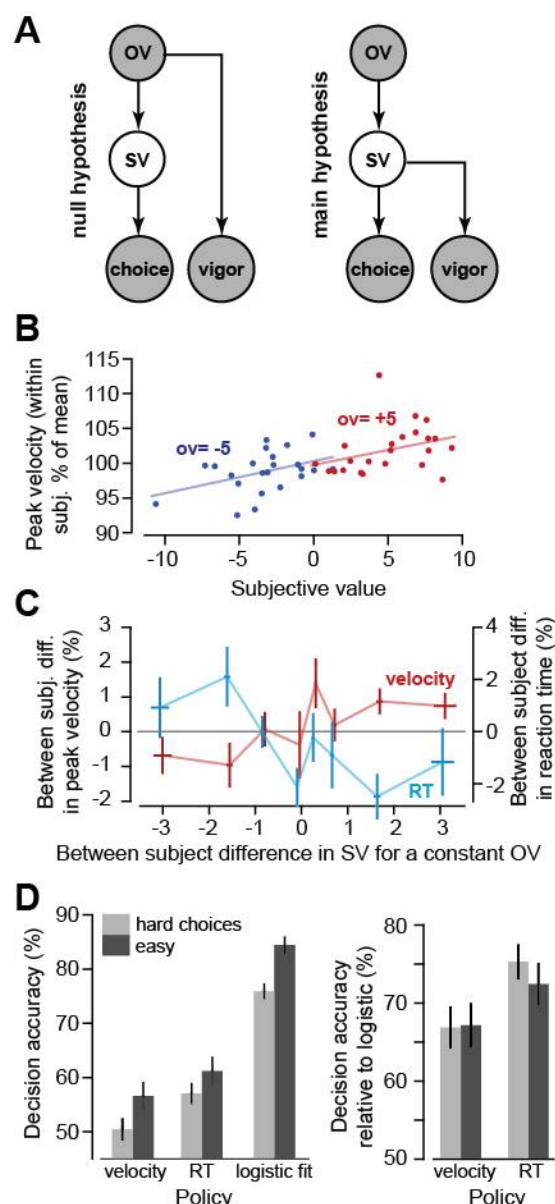

**Fig. 3.** Statistical relationship between vigor, objective value (OV), and subjective value (SV). **A.** Graphical model representing two hypotheses. Each circle is a random variable. OV is objective value, and SV is subjective value. The filled circles are measured variables. The unfilled circle is not measured but estimated. In the null hypothesis, choice depends on SV, and both SV and vigor depend on OV. In the main hypothesis, SV affects both choice and vigor. **B.** To evaluate merits of the hypotheses, we kept OV constant and measured variability in vigor as a function of variability in SV. In this plot blue dots are peak saccade velocity as a function of subjective value (each dot is a participant), for the fixed objective value of -5. The red dots are for the fixed objective value of +5. For a given stimulus, some participants assigned a high SV, while others assigned a low SV. Vigor appeared to be higher when the participant assigned a high SV to the stimulus. **C.** To consider the data in part B across stimuli, we found the mean of the dot distribution for each stimulus (for example, the mean for the stimulus OV=+5), and then represented each dot with respect to the within stimulus mean. The result revealed that for a constant OV, a change in SV produced a change in vigor, thus rejecting the null hypothesis. **D.** Ability to predict decisions from vigor patterns in the probe trials. Hard choices are those in which the difference between the objective values of the two options was 1 point or less. Easy choices are those in which this difference was greater than 1 point. The velocity and reaction time based policies computed subjective values based on probe trials, and then predicted choices in decision trials. Logistic fit policy fit the data in decision trials and predicted choice in the same data set. The left panel shows accuracy of each

policy. The right panel shows accuracy of the vigor based policies relative to the logistic fit policy of the same participant.

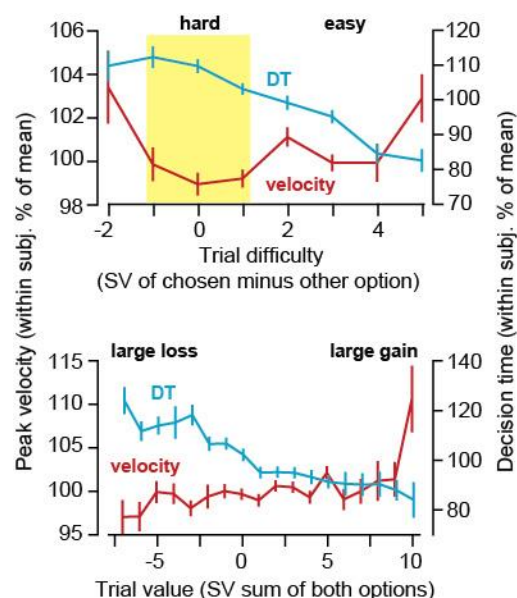

**Fig. 4.** Behavior during decision trials. Decision time (DT) refers to time from trial onset to the movement onset that indicated choice (saccade). Peak velocity refers to the velocity of the saccade that indicated choice. Top panel: trial difficulty was measured for each participant via the difference between subjective value of the chosen option minus the value of the other option. Hard choices are those in which this difference is less than or equal to 1. Easy choices are those in which this difference is greater than 1. Bottom panel: trial value was measured for each participant via the sum of the subjective values of the two options. When this sum was large and positive, both options were good, predicting gain regardless of the chosen option. When this sum was large and negative, both options were bad, thus predicting loss.
